# Supplementary material for: The Association of Domestic Incense Burning with Hypertension and Blood Pressure in Guangdong, China
Source: PubMed Central journal article supplement (PMC5551226; doi:10.3390/ijerph14070788), 2017-07-14
Supplement: ijerph-14-00788-s001.pdf [file ijerph-14-00788-s001.pdf]

**Table s1. Season-specific association between domestic incense burning and hypertension risk**

| Variable                            | Crude OR<br>(95% CI) | <i>P</i> value | Adjusted OR *<br>(95% CI) | <i>P</i> value |
|-------------------------------------|----------------------|----------------|---------------------------|----------------|
| <b>Warm (May-October)</b>           |                      |                |                           |                |
| <b>Incense burning</b>              |                      |                |                           |                |
| No                                  | Reference            |                | Reference                 |                |
| Yes                                 | 1.15 (0.91 -1.47)    | 0.24           | 1.11 (0.86-1.44)          | 0.40           |
| <b>Frequency of incense burning</b> |                      |                |                           |                |
| Never                               | Reference            |                | Reference                 |                |
| Occasional                          | 1.08 (0.84-1.39)     | 0.56           | 1.06 (0.81-1.38)          | 0.66           |
| Daily                               | 1.43 (1.01-2.02)     | 0.04           | 1.31 (0.91-1.91)          | 0.15           |
| <i>P</i> for trend                  | 0.06                 |                | 0.19                      |                |
| <b>Cold (November-April)</b>        |                      |                |                           |                |
| <b>Incense burning</b>              |                      |                |                           |                |
| No                                  | Reference            |                | Reference                 |                |
| Yes                                 | 1.37 (1.02-1.84)     | 0.04           | 1.26 (0.92-1.72)          | 0.15           |
| <b>Frequency of incense burning</b> |                      |                |                           |                |
| Never                               | Reference            |                | Reference                 |                |
| Occasional                          | 1.39 (1.02-1.89)     | 0.04           | 1.25 (0.90-1.73)          | 0.19           |
| Daily                               | 1.31 (0.86-2.01)     | 0.21           | 1.30 (0.82-2.05)          | 0.26           |
| <i>P</i> for trend                  | 0.09                 |                | 0.18                      |                |

\*Adjusted for age, sex, BMI, ETS exposure, cooking fuel type, ventilation, education level, and physical exercise, and county/district-specific GDP in the two-level logistic regression models.
